# Supplementary material for: Viscoelasticity of anionic wormlike micelles: effects of ionic strength and small hydrophobic molecules
Source: Royal Society of Chemistry journal article supplement (doi:10.1039/c2sm27078a), 2012-11-27
Supplement: c2sm27078a.pdf [file c2sm27078a.pdf]

## Viscoelasticity of anionic wormlike micelles: effects of ionic strength and small hydrophobic molecules

Alan Parker and Wolfgang Fieber

### Supplementary Material

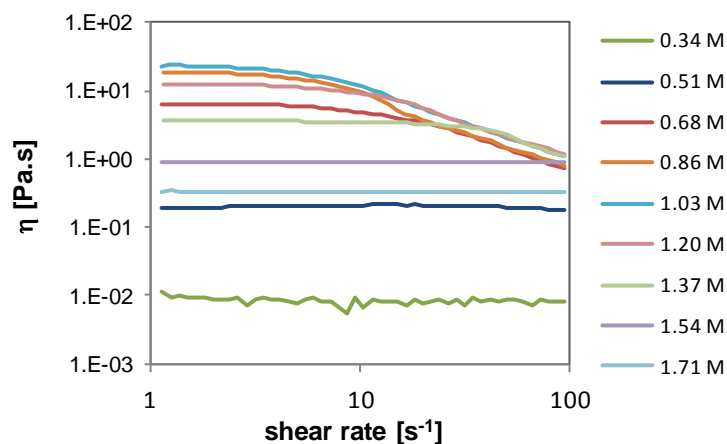

Figure S1. Flow curves of aqueous solutions of SLES at 10% in the presence of increasing concentrations of NaCl.

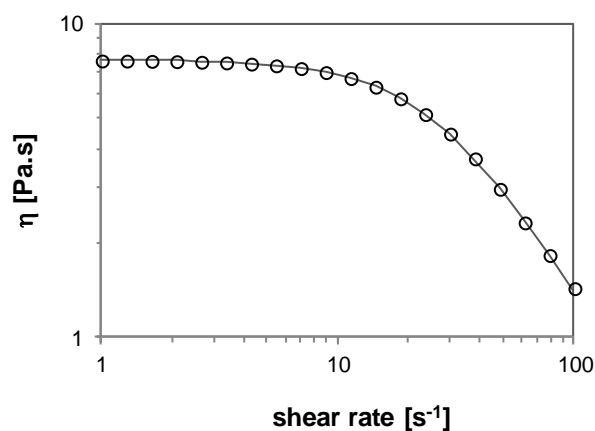

Figure S2. Example of fitting of an experimental flow curve of SLES 10% in the presence of 0.5% vanillin to the model of Carreau. Fitting parameters were zero-shear viscosity,  $\eta_0$  (7.7 Pa.s), critical shear rate,  $\dot{\gamma}$  ( $27 \text{ s}^{-1}$ ), and shear thinning index,  $n$  (-1).

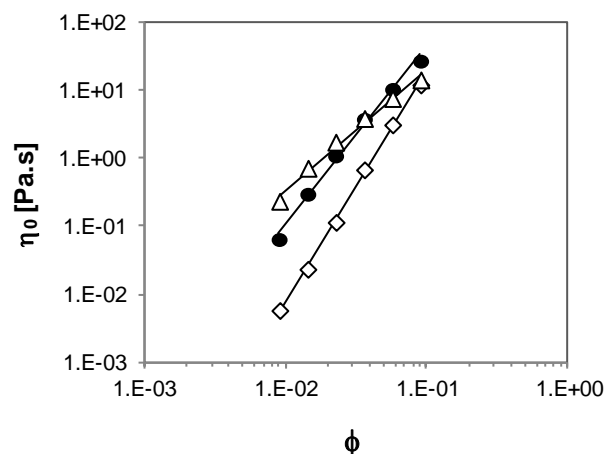

Figure S3. Variation of the zero-shear viscosity with the surfactant volume fraction at three different concentrations of sodium ion: 1.07 M ( $\diamond$ ), 1.31 M ( $\bullet$ ) and 1.53 M ( $\Delta$ ). The lines show fits to a power law. The scaling exponents  $n$  in  $\eta_0 \sim \phi^n$ : 3.4, 2.7 and 1.8, respectively.

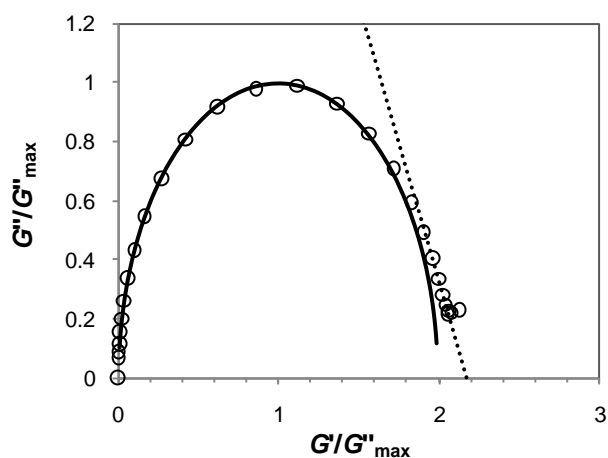

Figure S4. Procedure to extract  $\bar{\zeta} = \tau_{br}/\tau_R$  from experimental Cole-Cole plots. The linear region where the experimental values (circles) deviate from the semi-circle defined by the Maxwell model (bold line) is fitted to a linear regression. At higher frequencies an upturn of  $G''$  as a function of  $G'$  is observed when Rouse-like motion is present. These data points are not included in the linear fit.  $G'_0$  is the value where this linear function crosses the abscissa  $G'/G'_{max}$ . The

diameter of the fitted semicircle DFS equals  $2/G^*_0$ , and by using this value  $\bar{\zeta}$  can be read out from Figure 2 in Turner and Cates (reference 31 in manuscript).

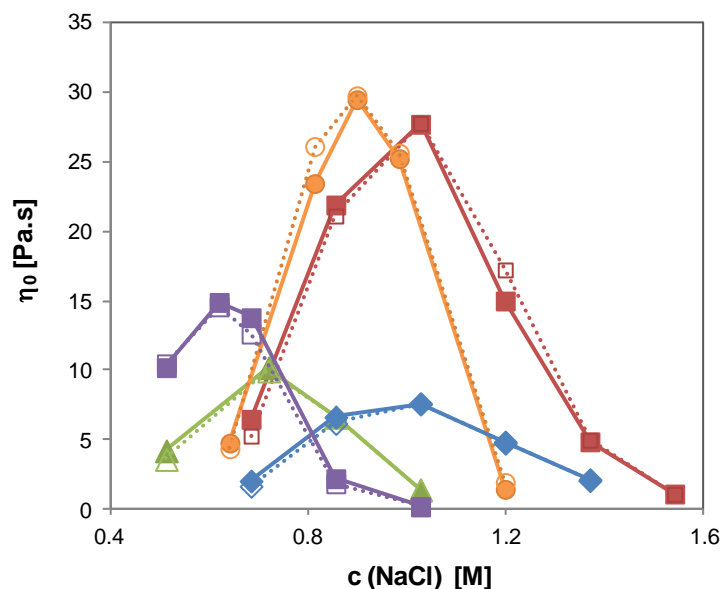

Figure S5. Comparison of zero-shear viscosity values from flow curves (full symbols) and obtained from oscillatory rheology measurements according to Equation 3 (open symbols). Values are shown for aqueous solutions of pure SLES (red), and of SLES in the presence of vanillin (blue), citronellol (violet), limonene (orange) and linalol (green).
